# Supplementary material
Source: PubMed Central journal article supplement (PMC4175446)

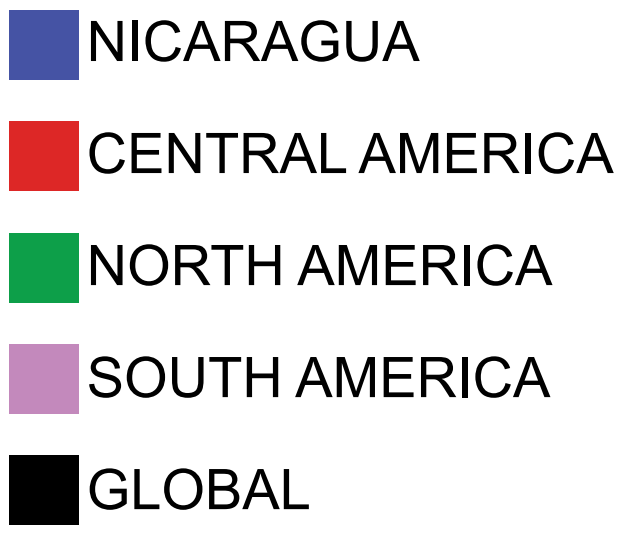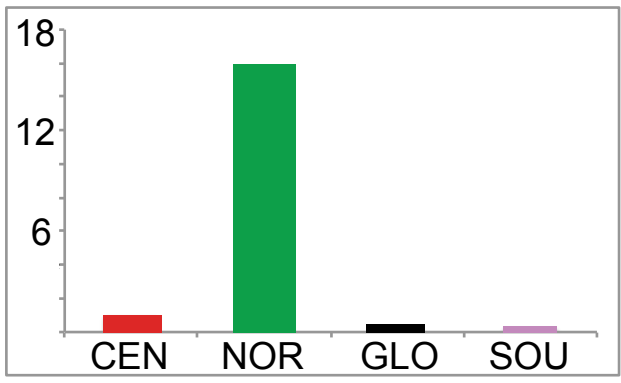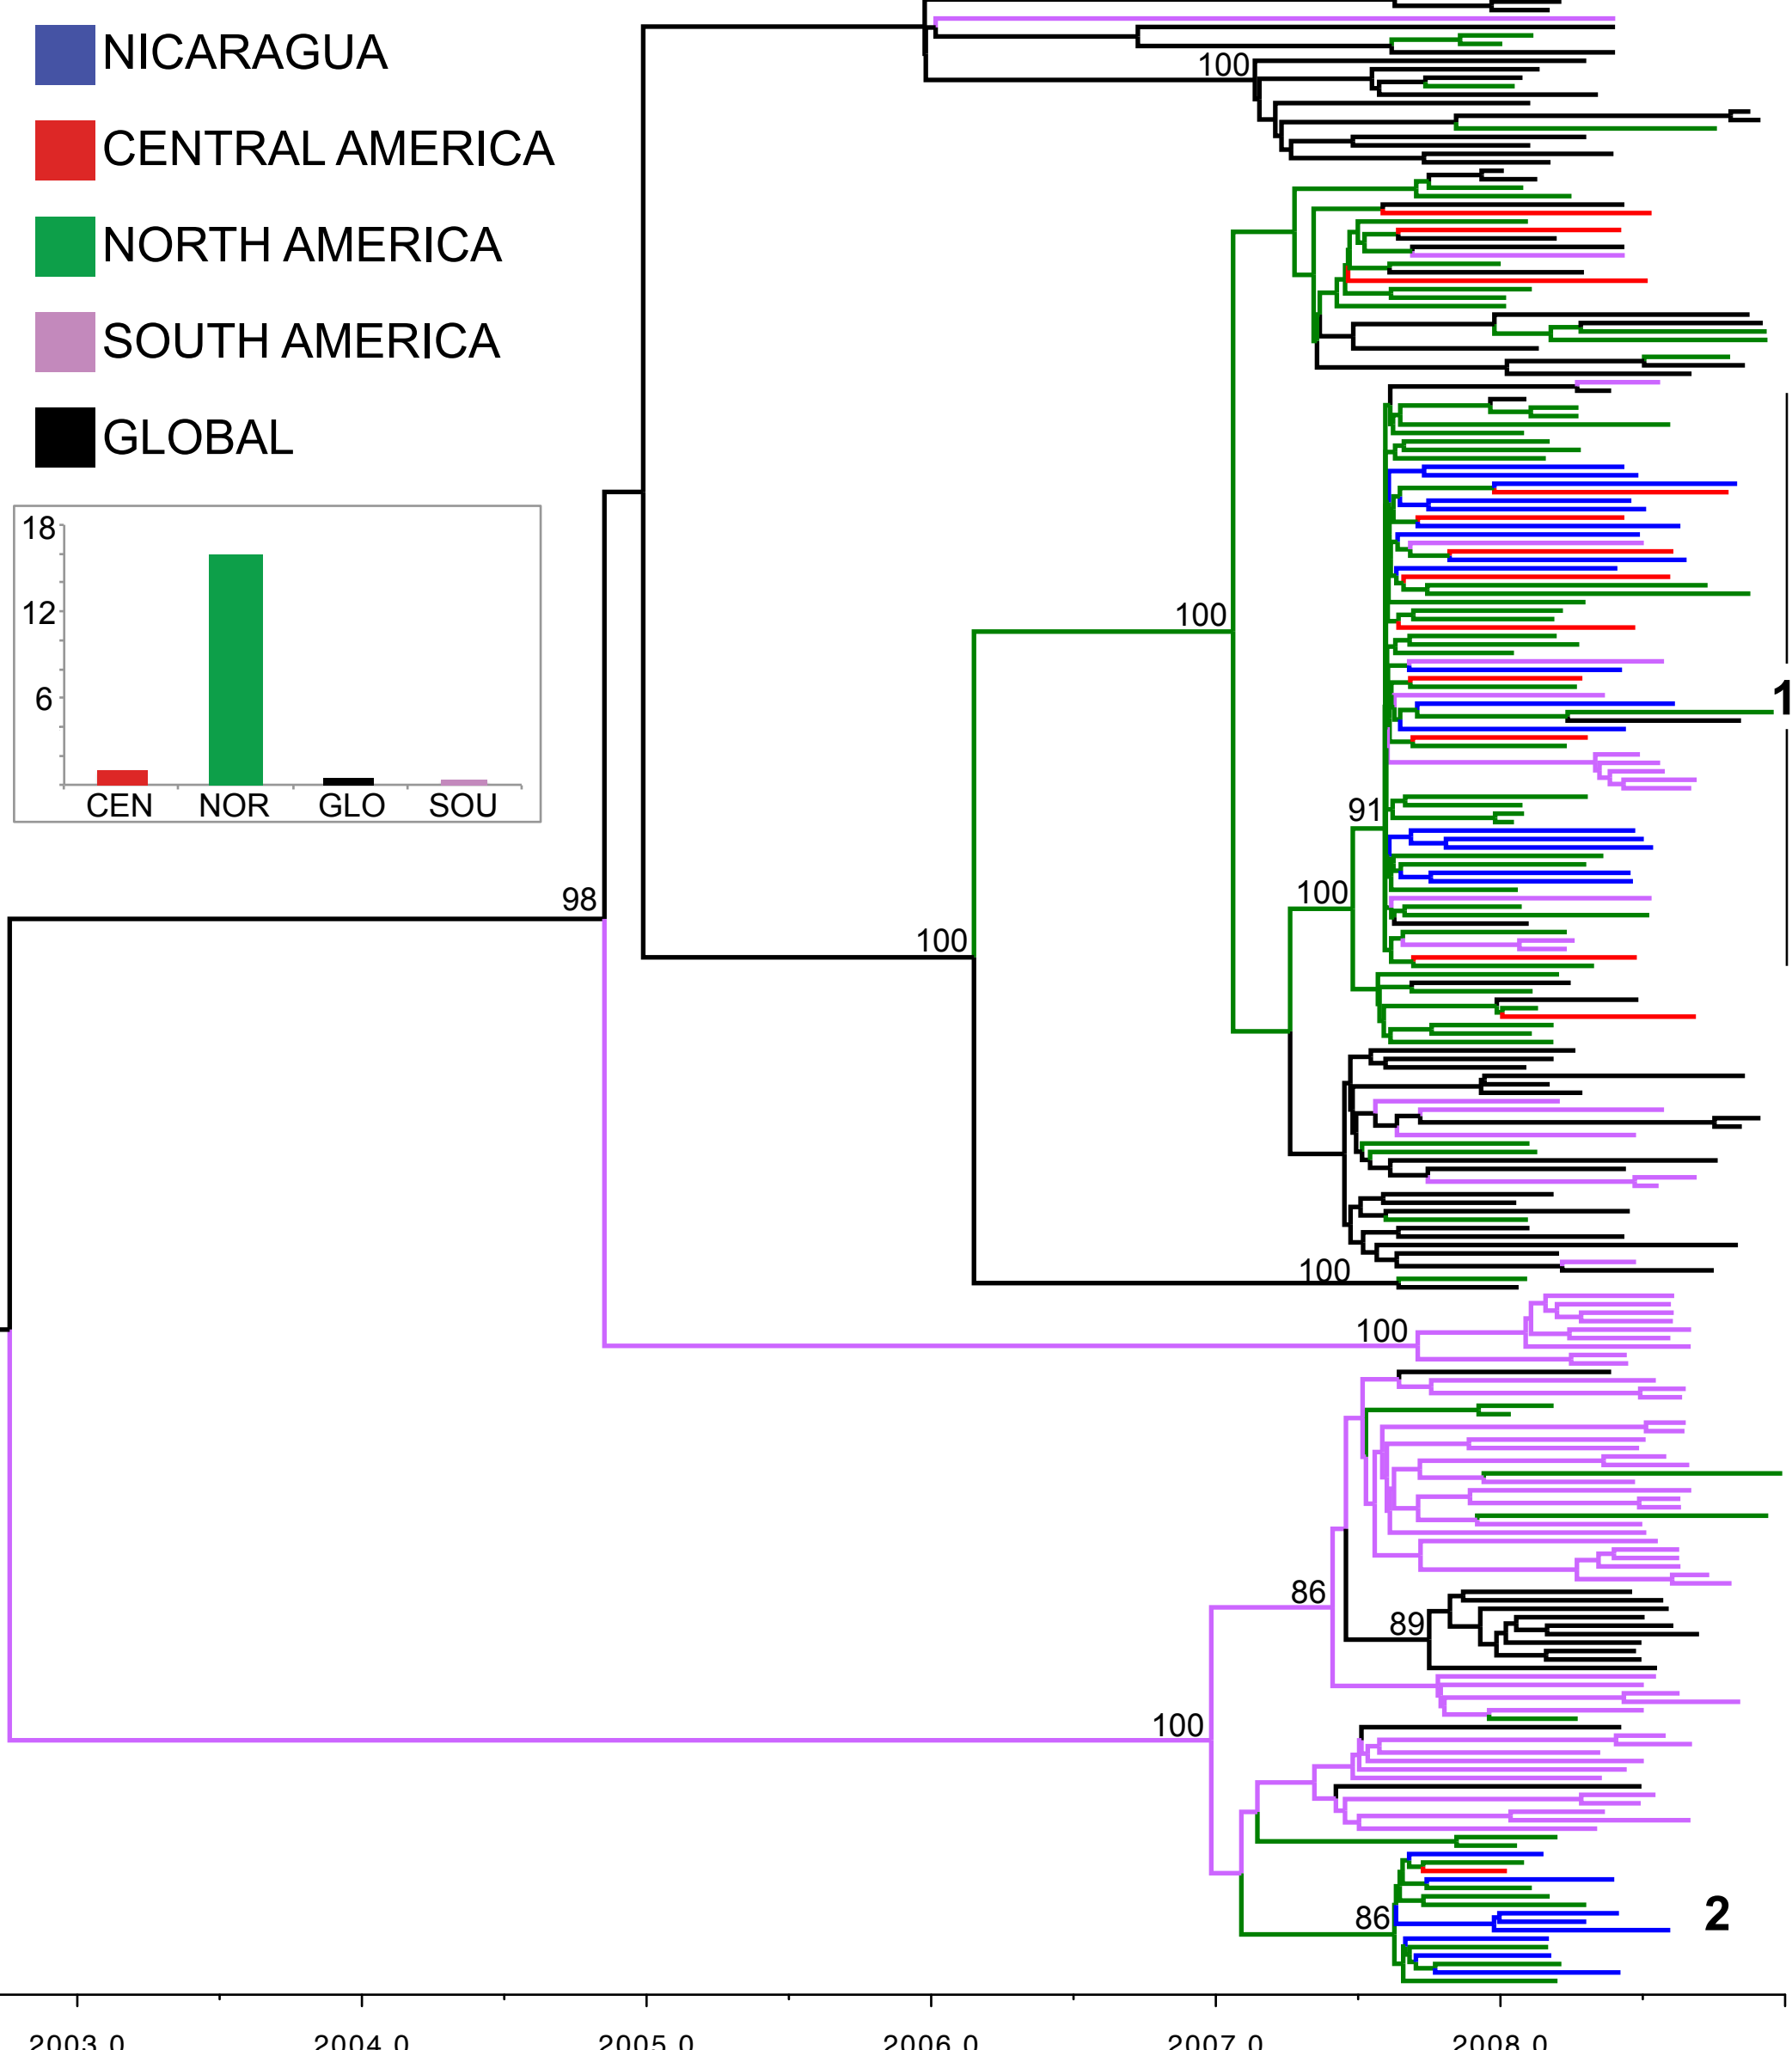

Supplement: NIHMS607773-supplement-01.pdf [file NIHMS607773-supplement-01.pdf]

- NICARAGUA
- CENTRAL AMERICA
- NORTH AMERICA
- SOUTH AMERICA
- GLOBAL

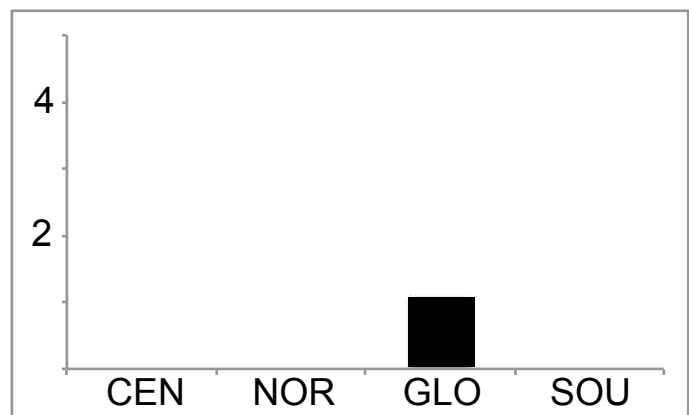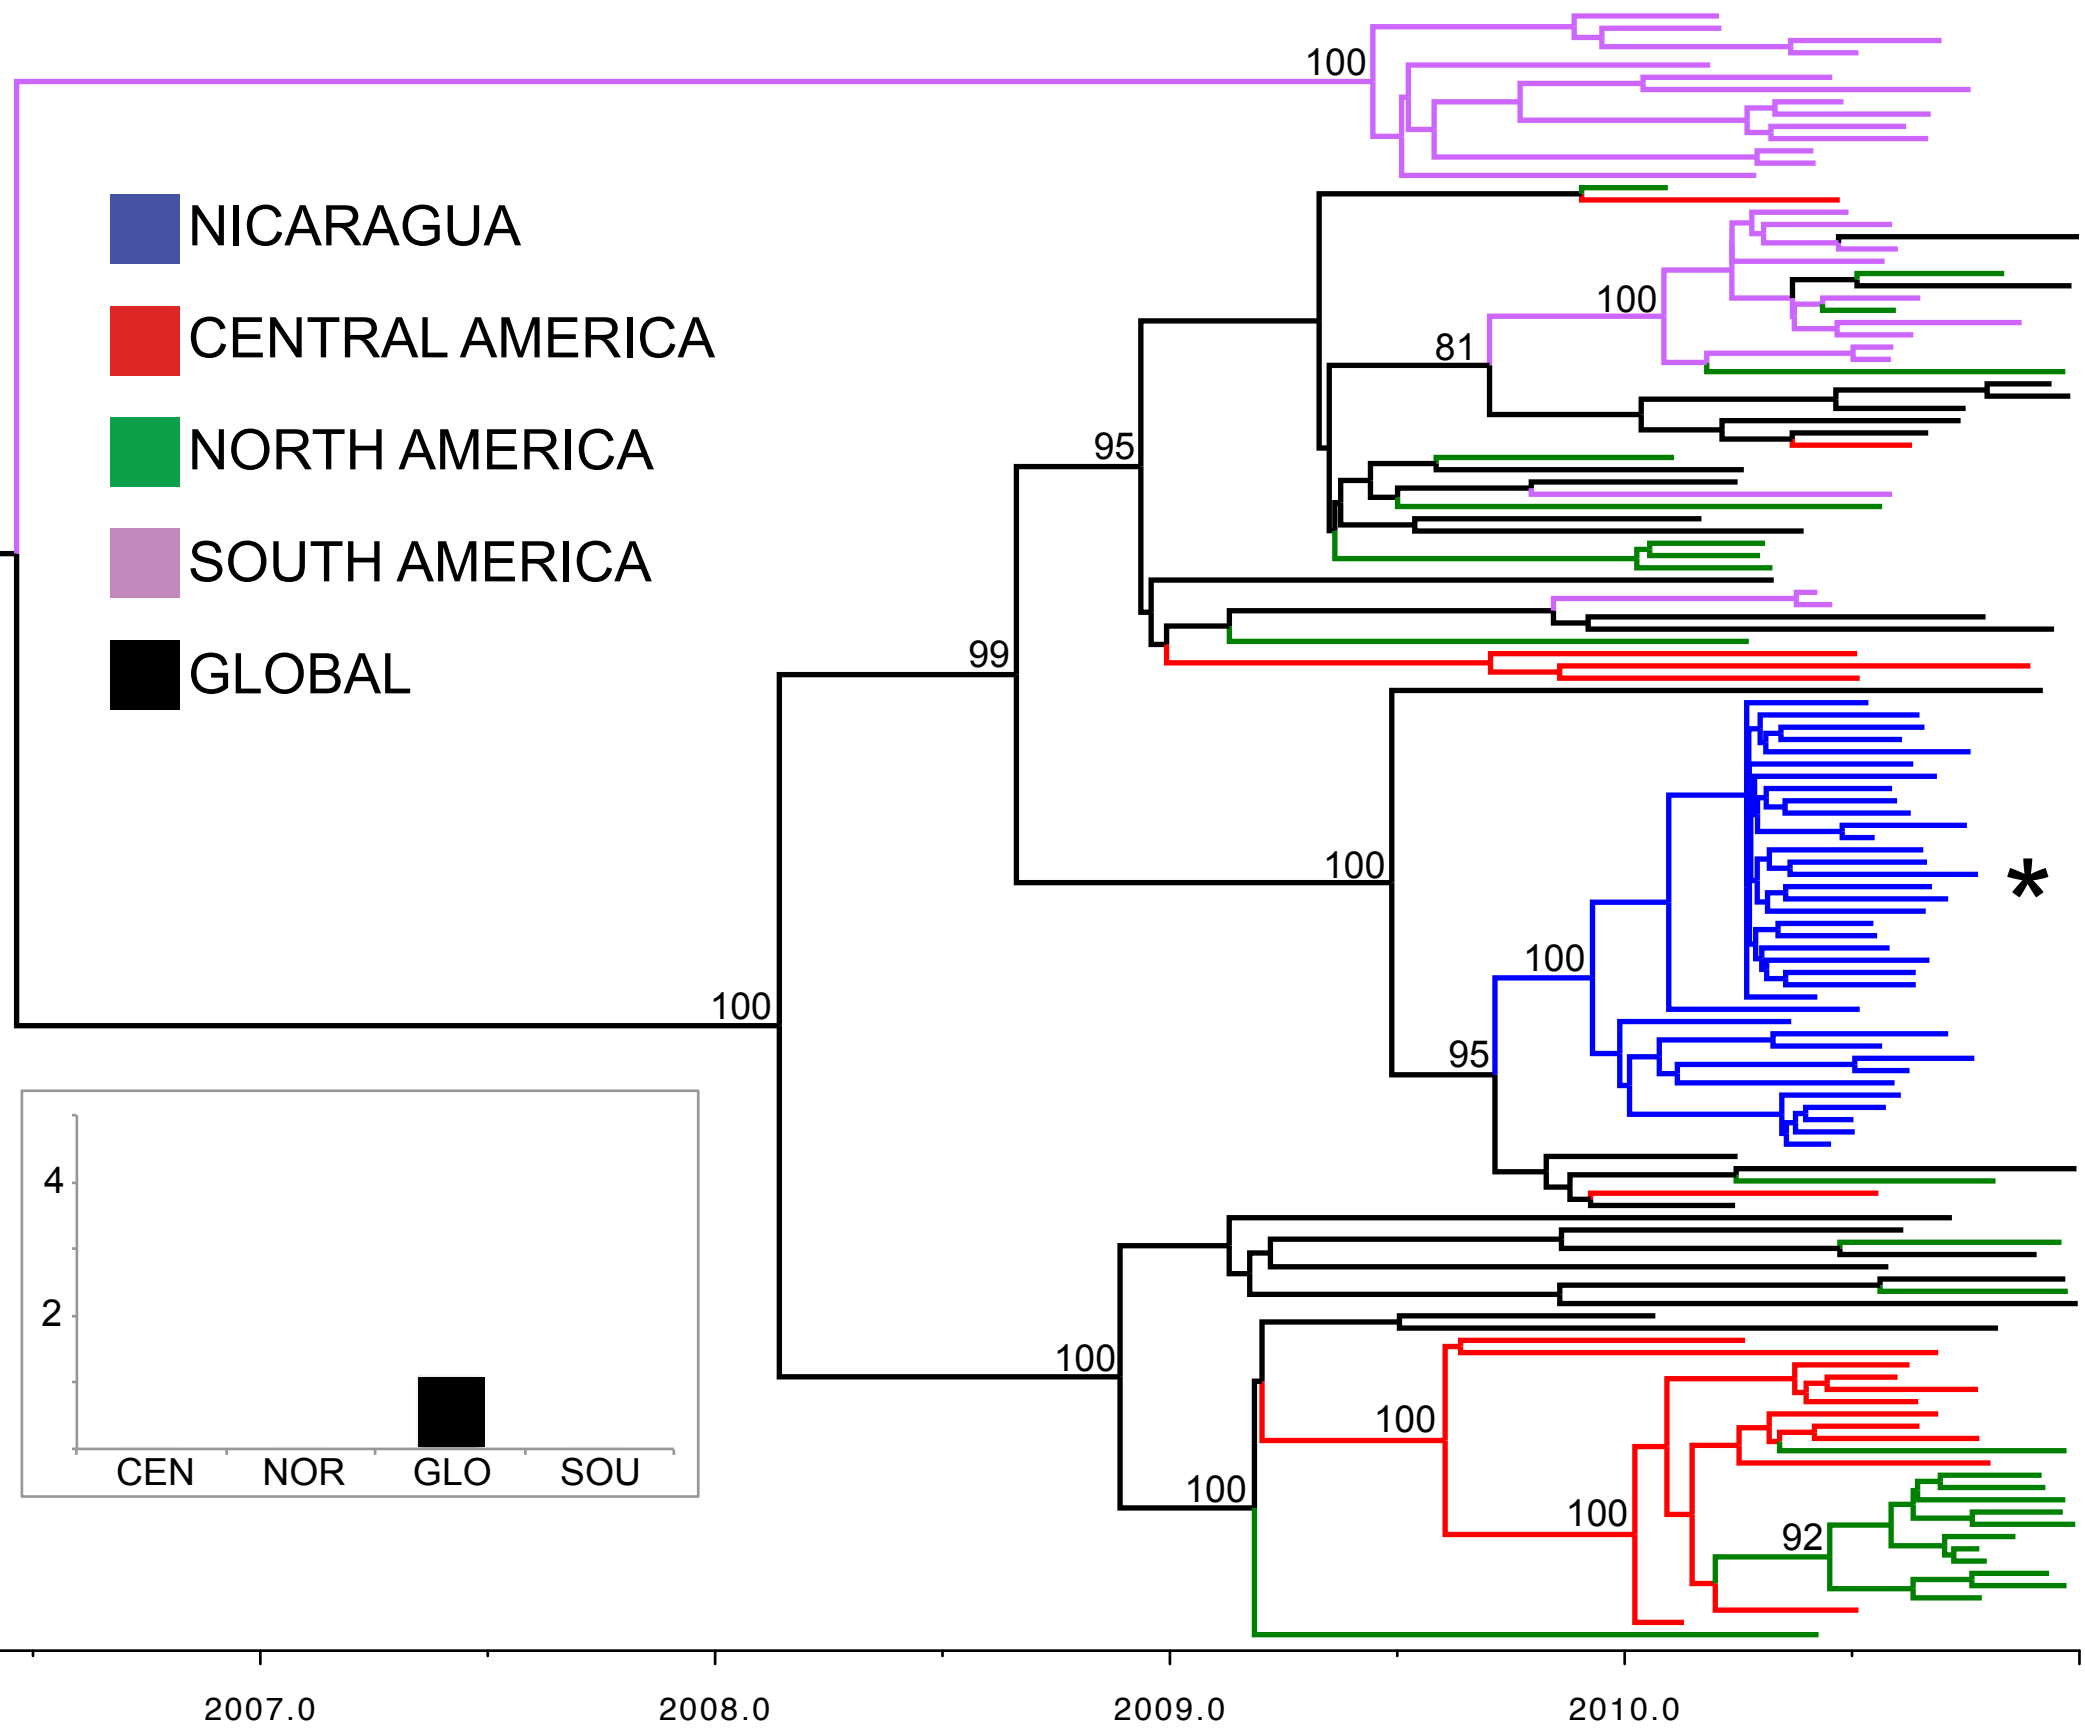

Supplement: NIHMS607773-supplement-02.pdf [file NIHMS607773-supplement-02.pdf]
